# Supplementary material for: Capns1 Specific Deletion in Macrophage Attenuates Skin Inflammation and Fibrosis in Systemic Sclerosis by Suppressing SHP2
Source: Research Square preprint supplement (doi:10.21203/rs.3.rs-8004677/v1), 2025-11-26
Supplement: Supplementary file 1 [file 0523dfe198c56930b64f2f9a.docx]

**Supplementary Table 5. Primary Antibodies for Western Blotting**

| Primary antibody | Ventor | Catalog No. | Working dilution |
| --- | --- | --- | --- |
| (for western blotting) |
| Calpain1 | CST | #2556 | 1：1000 |
| Calpain2 | CST | #2539 | 1：1000 |
| Capns1 | Abclonal | A6539 | 1：1000 |
| Collagen Ia | Abclonal | A5786 | 1：1000 |
| Collagen III | Abclonal | A3795 | 1：1000 |
| α-SMA | Abclonal | A17910 | 1：1000 |
| FAP | Abclonal | A23789 | 1：1000 |
| SHP2 | Abclonal | A2793 | 1：1000 |
| p65 | Abclonal | A22684 | 1：1000 |
| p-p65 | Abclonal | AP0475 | 1：1000 |
| IκBα | Abclonal | A11168 | 1：1000 |
| LaminB1 | Abclonal | A11495 | 1：1000 |
| β-actin | Abclonal | AC026 | 1:100000 |
