# Supplementary material for: Capns1 Specific Deletion in Macrophage Attenuates Skin Inflammation and Fibrosis in Systemic Sclerosis by Suppressing SHP2
Source: Research Square preprint supplement (doi:10.21203/rs.3.rs-8004677/v1), 2025-11-26
Supplement: Supplementary file 2 [file 107a0246fbc9ac6c5393f413.docx]

**Supplementary Table 4. Primer sequences for qPCR**

| Gene | Primer | Sequence (5’-3’) |
| --- | --- | --- |
| Calpain1 | Forward | TCAACCTTCGGGAAGTCAGC |
| Reverse | CATGTCATCCCCTGCCAACT |
| Calpain2 | Forward | GCTGCCCTGTCAACTTCATC |
| Reverse | TTTCCAGACGGACCAAACAC |
| Capns1 | Forward | CGGGAACATGGATTTCGATAAC |
| Reverse | CGGTGCCATTTTTGTCAAGAGAT |
| IL-1β | Forward | GAAATGCCACCTTTTGACAGTG |
| Reverse | TGGATGCTCTCATCAGGACAG |
| IL-6 | Forward | CTGCAAGAGACTTCCATCCAG |
| Reverse | AGTGGTATAGACAGGTCTGTTGG |
| iNOS | Forward | GTTCTCAGCCCAACAATACAAGA |
| Reverse | GTGGACGGGTCGATGTCAC |
| TNF-α | Forward | CAGGCGGTGCCTATGTCTC |
| Reverse | CGATCACCCCGAAGTTCAGTAG |
| PTPN11 | Forward | GGAGAGCATCGTGGATGC |
| Reverse | TCCCAGCGCTGCAGTGAA |
| β-actin | Forward | AGCCATGTACGTAGCCATCC |
| Reverse | GCTGTGGTGGTGAAGCTGTA |
