# Supplementary material for: Capns1 Specific Deletion in Macrophage Attenuates Skin Inflammation and Fibrosis in Systemic Sclerosis by Suppressing SHP2
Source: Research Square preprint supplement (doi:10.21203/rs.3.rs-8004677/v1), 2025-11-26
Supplement: Supplementary file 3 [file 3c4d2aff69f1084c036f96d3.docx]

**Supplementary Table 1. Clinincal information about patients and volunteers**

| Sample number | Gender | Age | Disease course | Detail of skin biopsy (date and site) | Previous treatment regimen |
| --- | --- | --- | --- | --- | --- |
| SSc-1 | female | 48 | 2 years | 2012.02.07; Right lower limb (anterior tibial) | Prednisone (10mg/d) + hydroxychloroquine + colchicine + cyclophosphamide (0.4/M) |
| SSc-2 | male | 70 | 1 month | 2017.09.26; Right forearm / left abdomen | / |
| SSc-3 | female | 16 | 2 years | 2017.09.18; Right forearm | Hydroxychloroquine + colchicine + prednisone |
| SSc-4 | female | 28 | 9 years | 2020.07.14; Leftt lower limb (anterior tibial) | Methylprednisolone (40mg/d) |
| SSc-5 | female | 49 | 6 years | 2015.05.12; Left forearm | Methylprednisolone (80mg/d) + cyclophosphamide (0.6/M) |
| SSc-6 | male | 57 | 4 years | 2018.10.18; Right fingers | Prednisone (10mg/d) |
| SSc-7 | female | 32 | 9 years | 2018.10.31; Left forearm | Salvia miltiorrhiza compound + Vitamin E |
| HC-1 | female | 43 | / | 2023.12.20 | / |
| HC-2 | female | 32 | / | 2023.12.20 | / |
| HC-3 | male | 35 | / | 2023.12.20 | / |
| HC-4 | female | 23 | / | 2023.12.20 | / |
| HC-5 | male | 18 | / | 2023.12.20 | / |
