# Supplementary material for: Capns1 Specific Deletion in Macrophage Attenuates Skin Inflammation and Fibrosis in Systemic Sclerosis by Suppressing SHP2
Source: Research Square preprint supplement (doi:10.21203/rs.3.rs-8004677/v1), 2025-11-26
Supplement: Supplementary file 4 [file 99b8b26b39073c89b0b116b1.docx]

**Supplementary Table 2. Sequences for lentivirus construction**

| Gene | Sequence (5’-3’) |
| --- | --- |
| M-Capns1-sh | CGGGAACATGGATTTCGATAA |
| M-PTPN11-sh | GACATCCTTATTGACATCATT |
| M-control-sh | TTCTCCGAACGTGTCACGT |
| PTPN11-overexpression | NM_011202.3，1794bp |
| Control-overexpression | Empty plasmid vector |
