# Supplementary material for: Capns1 Specific Deletion in Macrophage Attenuates Skin Inflammation and Fibrosis in Systemic Sclerosis by Suppressing SHP2
Source: Research Square preprint supplement (doi:10.21203/rs.3.rs-8004677/v1), 2025-11-26
Supplement: Supplementary file 5 [file ad450b122e6fe98753491b78.docx]

**Supplementary Table 3. Primary Antibodies for IF and IHC staining**

| Primary antibody | Ventor | Species | Catalog No. | Working dilution |
| --- | --- | --- | --- | --- |
| (for IF or for IHC staining) |
| F4/80 | Abclonal | Mouse | A18637 | IF: 1：200 |
| CD68 | Abclonal | Human | A23205 | IF: 1：200 |
| Capns1 | Abcam | Human, mouse | ab28237 | IF: 1：200 |
| SHP2 | Abclonal | Human, mouse | A19112 | IF: 1：200 |
| Capns1 | Abclonal | Human, mouse | A6539 | IHC: 1：100 |
| SHP2 | Abclonal | Human, mouse | A2793 | IHC: 1：100 |
